# Supplementary material
Source: PubMed Central journal article supplement (PMC3632907)
Supplement: AAC.02307-12_zac999101786so1.pdf [file AAC.02307-12_zac999101786so1.pdf]

## Supplementary Material

Table S1. Primers used for quantitative real-time PCR.

| <b>SEQUENCE (5'-3')</b>    | <b>PRIMER</b> |
|----------------------------|---------------|
| ACGGTATCAACGTTTGCCGGTGA    | Sa-Ehp-For    |
| GCTCTTTGTGCTTTACGGTGTGTTGC | Sa-Ehp-Rev    |
| AACAGCAGATGCGAGCGAAGG      | Sa-Efb-For    |
| TGCATCAGTTTTCGCTGCTGGT     | Sa-Efb-Rev    |
| AGCCCCATCACTCGGTGGTAA      | Sa-HlgC-For   |
| TGAATTCGCTTTGACGCCCA       | Sa-HlgC-Rev   |
| AAGCAATCGCTGACGCTGGT       | Sa-FabH-For   |
| AGGCAACTTTGCCCGTCCCTA      | Sa-FabH-Rev   |
| AGGTACCGAGCCAGCTAAAGGT     | Sa-PlsX-For   |
| CGCCATCCATTAATGTCTTCGCTTCA | Sa-PlsX-Rev   |
| GCCGATGTGGATGGAGCGCA       | Sa-GyrB-For   |
| AAAGAGCGCGGTGCTCAGGG       | Sa-GyrB-Rev   |
| CCATCTGGAGTAGGTAAAGG       | Sa-Gmk-For    |
| CTACGCCATCAACTTCAC         | Sa-Gmk-Rev    |

**Table S2. Gene expression changes following AFN-1252 treatment.**

*S. aureus* genes with significantly ( $p < 0.05$ ) different expression levels ( $\pm 1.4$  fold) following a 15 minute treatment with 50 ng/ml AFN-1252. The data was abstracted from the complete dataset deposited in NCBI's Gene Expression Omnibus(10) and are accessible through GEO Series accession number GSE19400 (<http://www.ncbi.nlm.nih.gov/geo/query/acc.cgi?acc=GSE19400>).

| Locus Tag | Gene        | AFN/DMSO <sup>a</sup> | p-value | Function                                                   |
|-----------|-------------|-----------------------|---------|------------------------------------------------------------|
| SA0165    |             | -2.05                 | 0.000   | similar to $\alpha$ -helical coiled-coil protein SrpF      |
| SA0166    |             | -1.80                 | 0.005   | ABC transporter                                            |
| SA0167    |             | -1.70                 | 0.007   | similar to membrane lipoprotein SrpL                       |
| SA0168    |             | -2.08                 | 0.008   | similar to ABC transporter                                 |
| SA0169    |             | -2.20                 | 0.000   | acyl-CoA dehydrogenase                                     |
| SA0198    | <i>oppF</i> | -1.71                 | 0.008   | putative peptide ABC transporter protein ATP-binding       |
| SA0199    | <i>oppB</i> | -1.84                 | 0.008   | putative peptide ABC transporter integral membrane protein |
| SA0200    |             | -2.46                 | 0.000   | putative peptide ABS transporter permease                  |
| SA0201    | <i>rlp</i>  | -2.00                 | 0.003   | RGD-containing lipoprotein                                 |
| SA0202    |             | -2.25                 | 0.000   | $\gamma$ -glutamyltranspeptidase precursor                 |
| SA0213    |             | -1.87                 | 0.020   | putative integral membrane protein                         |
| SA0219    | <i>pflA</i> | -1.52                 | 0.035   | pyruvate formate-lyase 2 activating enzyme                 |
| SA0309    | <i>geh</i>  | -2.00                 | 0.002   | lipase precursor                                           |
| SA0368    |             | -2.31                 | 0.000   | putative excitatory amino acid transporter                 |
| SA0395    |             | -2.86                 | 0.000   | hypothetical protein [Pathogenicity island SaPln2]         |
| SA0397    | <i>lpl2</i> | -1.54                 | 0.040   | hypothetical protein [Pathogenicity island SaPln2]         |
| SA0411    | <i>ndhF</i> | -1.97                 | 0.000   | NADH dehydrogenase subunit 5                               |
| SA0412    |             | -2.24                 | 0.001   | hypothetical protein                                       |
| SA0418    | <i>cysM</i> | -2.13                 | 0.000   | cysteine synthase                                          |
| SA0419    | <i>metB</i> | -2.38                 | 0.019   | cystathionine $\gamma$ -synthase                           |
| SA0420    |             | -1.78                 | 0.001   | putative amino acid ABC transporter                        |
| SA0421    |             | -1.56                 | 0.002   | putative amino acid ABC transporter                        |
| SA0422    |             | -1.75                 | 0.001   | putative D-methionine-binding lipoprotein metQ precursor   |
| SA0427    |             | 1.41                  | 0.011   | uncharacterized membrane protein                           |
| SA0471    | <i>cysK</i> | -1.55                 | 0.002   | cysteine synthase                                          |
| SA0660    | <i>saeS</i> | -1.77                 | 0.009   | two-component sensor kinase                                |
| SA0661    | <i>saeR</i> | -2.45                 | 0.003   | two-component response regulator                           |
| SA0662    | <i>saeQ</i> | -4.94                 | 0.000   | hypothetical protein                                       |
| SA0663    | <i>saeP</i> | -4.40                 | 0.000   | hypothetical protein                                       |
| SA0746    |             | -2.36                 | 0.000   | thermonuclease precursor                                   |
| SA0792    |             | 1.44                  | 0.001   | hypothetical protein                                       |
| SA0793    | <i>dltA</i> | 1.62                  | 0.006   | D-alanine--poly(phosphoribitol)ligase subunit 1            |
| SA0822    | <i>argG</i> | -1.60                 | 0.020   | argininosuccinate synthase                                 |
| SA0842    | <i>fabH</i> | 2.86                  | 0.000   | 3-oxoacyl-[acyl-carrier-protein] synthase III              |
| SA0843    | <i>fabF</i> | 1.79                  | 0.005   | 3-oxoacyl-[acyl-carrier-protein] synthase II               |
| SA0879    | <i>htrA</i> | 1.44                  | 0.027   | periplasmic serine protease                                |
| SA0891    |             | -1.50                 | 0.012   | iron(III) ABC transporter, periplasmic protein             |
| SA1000    | <i>ehp</i>  | -3.63                 | 0.001   | fibrinogen-binding protein precursor                       |
| SA1003    | <i>efb</i>  | -3.49                 | 0.000   | fibrinogen-binding protein precursor                       |
| SA1007    |             | -1.70                 | 0.009   | $\alpha$ -hemolysin precursor ( $\alpha$ -toxin)           |
| SA1071    | <i>fapR</i> | 2.08                  | 0.000   | transcriptional regulator of fatty acid biosynthesis       |
| SA1072    | <i>plsX</i> | 1.97                  | 0.000   | acyl-phosphate synthase                                    |
| SA1073    | <i>fabD</i> | 1.73                  | 0.000   | malonyl coenzyme A-acyl carrier protein transacylase       |
| SA1074    | <i>fabG</i> | 1.50                  | 0.001   | 3-oxoacyl-[acyl-carrier protein] reductase                 |
| SA1140    | <i>glpF</i> | 1.58                  | 0.001   | glycerol uptake facilitator protein                        |

|        |             |       |       |                                                                 |
|--------|-------------|-------|-------|-----------------------------------------------------------------|
| SA1141 | <i>glpK</i> | 1.43  | 0.021 | glycerol kinase                                                 |
| SA1142 | <i>glpD</i> | 1.86  | 0.000 | anaerobic glycerol-3-phosphate dehydrogenase subunit A          |
| SA1160 | <i>nuc</i>  | 1.45  | 0.044 | thermonuclease precursor                                        |
| SA1175 |             | -1.50 | 0.012 | hypothetical protein                                            |
| SA1188 | <i>parE</i> | 1.46  | 0.003 | DNA gyrase B subunit                                            |
| SA1224 |             | 1.50  | 0.002 | probable ATP-binding component of ABC transporter               |
| SA1270 |             | -1.53 | 0.002 | solute carrier family 7                                         |
| SA1271 |             | -1.65 | 0.005 | threonine dehydratase                                           |
| SA1272 |             | -1.55 | 0.009 | nicotinamide nucleotide transhydrogenase subunit $\alpha$ 1     |
| SA1319 |             | -1.71 | 0.026 | hypothetical protein                                            |
| SA1432 |             | -2.06 | 0.000 | branched-chain amino acid transport system II carrier protein   |
| SA1433 |             | -1.94 | 0.001 | Lamb                                                            |
| SA1434 |             | -2.02 | 0.002 | similar to acetyl-CoA carboxylase $\alpha$ chain                |
| SA1435 |             | -2.13 | 0.000 | similar to biotin carboxyl carrier subunit                      |
| SA1436 |             | -1.80 | 0.000 | putative urea carboxylase                                       |
| SA1437 |             | -1.65 | 0.000 | urea carboxylase                                                |
| SA1547 | <i>ptaA</i> | 1.45  | 0.034 | PTS system, IIBC component                                      |
| SA1550 | <i>tyrS</i> | 1.43  | 0.015 | tyrosyl-tRNA synthetase                                         |
| SA1586 | <i>ribH</i> | 1.46  | 0.026 | 6,7-dimethyl-8-ribityllumazine synthase                         |
| SA1587 | <i>ribA</i> | 1.41  | 0.008 | riboflavin biosynthesis                                         |
| SA1675 |             | -1.60 | 0.008 | amino acid ABC transporter                                      |
| SA1746 |             | -1.62 | 0.023 | hypothetical protein                                            |
| SA1747 |             | -1.54 | 0.007 | ATP-binding transport protein natA                              |
| SA1748 |             | -1.62 | 0.018 | transcriptional repressor                                       |
| SA1750 |             | -2.05 | 0.002 | truncated cell surface protein map-w                            |
| SA1752 |             | -8.18 | 0.000 | truncated $\beta$ -hemolysin                                    |
| SA1811 | <i>hly</i>  | -3.63 | 0.000 | phospholipase C precursor ( $\beta$ -hemolysin)                 |
| SA1812 |             | -2.72 | 0.005 | $\gamma$ -hemolysin component B precursor                       |
| SA1820 |             | -1.59 | 0.012 | hypothetical protein [Pathogenicity island SaPI <sub>n1</sub> ] |
| SA1849 |             | -2.21 | 0.002 | hypothetical protein                                            |
| SA1850 |             | -2.06 | 0.001 | putative transport permease                                     |
| SA2080 |             | -1.49 | 0.013 | similar to butyryl-CoA dehydrogenase                            |
| SA2094 |             | -1.58 | 0.002 | sodium:proton antiporter                                        |
| SA2121 | <i>hutI</i> | -1.52 | 0.003 | imidazolonepropionase                                           |
| SA2169 |             | 1.48  | 0.007 | hypothetical transcription regulatory protein                   |
| SA2206 | <i>sbi</i>  | -3.72 | 0.001 | immunoglobulin G binding protein A precursor                    |
| SA2207 | <i>hlyA</i> | -4.21 | 0.000 | $\gamma$ -hemolysin component A precursor                       |
| SA2208 | <i>hlyC</i> | -4.99 | 0.000 | $\gamma$ -hemolysin component C precursor                       |
| SA2209 | <i>hlyB</i> | -4.78 | 0.001 | $\gamma$ -hemolysin component B precursor                       |
| SA2264 |             | -1.70 | 0.014 | hypothetical protein                                            |
| SA2405 | <i>betA</i> | -2.71 | 0.002 | betaine aldehydedehydrogenas                                    |
| SA2406 | <i>gbsA</i> | -2.47 | 0.000 | betaine aldehydedehydrogenas                                    |
| SA2408 | <i>cutT</i> | -2.01 | 0.001 | choline-glycine betaine transporter                             |
| SA2428 | <i>arcA</i> | 1.59  | 0.002 | arginine deiminase                                              |
| SA2434 |             | 1.40  | 0.004 | PTS system, fructose-specific IIA:FPr component                 |
| SA2460 | <i>icaD</i> | -1.54 | 0.007 | intercellular adhesion protein D                                |
| SA2462 | <i>icaC</i> | -1.61 | 0.003 | intercellular adhesion protein C                                |

<sup>a</sup>Ratio of expression levels in cells treated with AFN-1252 to DMSO control.
